# Supplementary material for: Measurement of geologic nitrogen using mass spectrometry, colorimetry, and a newly adapted fluorometry technique
Source: Copernicus journal article supplement (doi:10.5194/se-8-307-2017), 2017-03-10
Supplement: Supplementary file 1 [file N_cc.xls]

## Sheet: Sheet1
N in cont crust								Date	Tills		Avg by day (ppm)	Avg by sample	SD	Date	Volcanics		Avg by day	Avg by sample	SD	Date	Carbonates		Average by day	Average by sample	SD	Date	Granitic		Average by day	Average by sample	SD	Date	All Gabbro	Gabbro	Average by day	Average by sample	SD	Date	Gniess	All Gniess	Average by day	Average by sample	SD	Date	Xenolith	All Xenolith	Average by day	Average by sample	SD
									Name	conc		Till-4			Name	conc		BCR-2			Name	conc					Name	conc		G-2			Name	conc					Name	conc					Name	conc
								2016_07_05	Till 1253 (1)	46.1318	38.3857	111.016	18.9827	2016_06_22	BCR-2 (1)	23.1963	29.6991	32.9367	14.3123	2016_06_28	J1408-5.1(1)	74.0854	79.7703	114.177	40.893	2016_06_28	Llang 955LML1 (1)	66.8868	38.1296	7.04705	7.11223	2016_06_28	Llang Gabbro (1)	20.1505	8.1985	All Gabbroic		2016_06_28	OMNG (1)	29.4592	29.7565	29.7565	0.794004	2016_06_28	Ruby Xenolith (1)	9.3588	6.38402	6.38402	2.6718
	Mass (%)	Mass (kg)	Avg N (ppm) or (mg/kg)	Mass N (kg)	Error				Till 1253 (2)	35.7573		Till1253			BCR-2 (2)	31.4014		BJ1604			J1408-5.1(2)	83.6507					Llang 955LML1 (2)	31.231		Llang 955			Llang Gabbro (2)	2.36521		2.84099	3.07053		OMNG (2)	29.1541					Ruby Xenolith (2)	5.60479
Upper Crust (tills)	0.53	1.007e+22	81.243	8.18117e+17	3.66074e+17				Till 1253 (3)	33.268		38.3857	6.82281		BCR-2 (3)	34.4994	Not included ->	249.28	58.8906		J1408-5.1(3)	81.5748					Llang 955LML1 (3)	16.2711		38.1296	26.0035		Llang Gabbro (3)	2.07979					OMNG (3)	30.6563					Ruby Xenolith (3)	4.18845
Upper Crust (Wedpohl proportions)	0.53	1.007e+22	124.02	1.24888e+18	6.70068e+16				Till 1236 (1)	110.669	137.993	Till 1236		2016_06_24	BCR-2 (1)	42.7126	30.0783	BJ1602		2016_07_05	J1408-5.1(1)	146.186	128.279			2016_07_05	96CR4 (1)	51.382	26.5987	96CR4		2016_08_03	069 (1)	1.9873	2.28756				ACG (1)	7.45037	6.20888	6.20888	1.3092		CM 25 (1)	91.6641	45.245	45.245	40.8683
Lower Crust	0.47	8.93e+21	31.5095	2.8138e+17	2.74364e+16	conc error			Till 1236 (2)	118.217		137.993	40.9646		BCR-2 (2)	25.0987		21.0302	3.64784		J1408-5.1(2)	105.87					96CR4 (2)	15.12		26.5987	21.4823		069 (2)	2.58782					ACG (2)	6.33515	All Gneiss				CM 25 (2)	14.6755
Total Mass of Crust (Tills)	1	1.9e+22	57.8683	1.0995e+18	3.67101e+17	20.7029			Till 1236 (3)	185.094		Till 1234			BCR-2 (3)	22.4236		BJ1603			J1408-5.1(3)	132.781					96CR4 (3)	13.2942		CR15		2016_08_03	Hornblendite						ACG (3)	4.84113	17.9827	16.6507			CM 25 (3)	29.3954
Total Mass of Crust (Wedpohl proportions)	1	1.9e+22	80.5402	1.53026e+18	7.24063e+16	8.35634			Till 4 (1)	70.0635	87.953	112.145	18.7094	2016_06_28	BJ1604 (1)	353.791	275.13	9.80744	3.8658	2016_07_13	J1408-5.1(1)	79.4409	82.5699				CR15 (1)	7.43097	37.9983	37.9983	51.5841		101 (1)	1.05117	0.907591									2016_07_05	CR56 Xenolith (1)	24.9448	23.7321	23.7321	2.97997
									Till 4 (2)	93.994		Till 3072			BJ1604 (2)	210.437		BJ1601			J1408-5.1(2)	65.1872					CR15 (2)	9.00845		SY-4			101 (2)	0.764016											CR56 Xenolith (2)	20.337
Upper cont crust proportions	Percentage	Avg N (ppm)	Avg N based on %	SD	Proportions based on Wedepohl, 1995				Till 4 (3)	99.8014		86.6185	13.2942		BJ1604 (3)	261.161		10.4644	6.11214		J1408-5.1(3)	103.081					CR15 (3)	97.5556		9.07584	8.02692		Olivine cumulate												CR56 Xenolith (3)	25.9146
Shale/silt	0.0616	1064.17	65.5529	6.97089					Till 1234 (1)	101.558	112.145	Till 3292			BJ1602 (1)	18.0933	21.0864	Ruby mtn Basalt		2016_08_02	J1408-5.1(1.a)	88.3759	122.657			2016_07_20	G-2.1(1)	8.03252	8.31882	34			021 (1)	1.62274	2.05566										CM 25 (1)	91.6641	45.245	45.245	40.8683
Sandstone	0.0294	230	6.762						Till 1234 (2)	101.129		65.6142	20.7372		BJ1602 (2)	24.2206		18.9745	31.3608		J1408-5.1(1.b)	150.973					G-2.1(2)	5.91372		10.6939	5.08413		021 (2)	2.48857											CM 25 (2)	14.6755
Volcanics	0.028	21.4153	0.599627	0.349529					Till 1234 (3)	133.747		Till 3095			BJ1602 (3)	20.9452		BJ1605			J1408-5.1(2.a)	128.622					G-2.1(3)	11.0102		107			030 (1)	0.730072	0.755636										CM 25 (3)	29.3954
Carbonates	0.0196	114.177	2.23786	0.801503				2016_07_13	Till 3072(1)	77.7412	86.6185	51.4055	0.913968		BCR-2 (1)	24.4323	20.958	15.7793	0.614034		J1408-5.1(2.b)	178.497	157.608				G-2.2(1)	1.87448	4.17842	8.45241	2.31274		030 (2)	0.781199											CM Xenolith (1)	33.9451	37.6384	37.6384	5.79145
Granitic	0.45	15.7578	7.09102	6.55133					Till 3072(2)	101.903		Till 3079			BCR-2 (2)	20.691		BJ1606			J1408-5.1(3.a)	91.944					G-2.2(2)	0.69463		76															CM Xenolith (2)	44.3131
Tonalite	0.05	24	1.2						Till 3072(3)	80.2114		46.7662	8.95817		BCR-2 (3)	17.7506		51.9273	6.44909		J1408-5.1(3.b)	202.382					G-2.2(3)	9.96616		1.86551	0.121802														CM Xenolith (3)	34.6569
Gabbro	0.06	11.2579	0.675471	0.754566					Till-4 (1)	123.132	104.042			Not included ->	BJ1603 (1)	79.6148	30.6143	CR56 Basalt									G-2.3(1)	2.02515	4.53106	41															94BRE330 Xenolith (1)	46.1459	37.3355	37.3355	8.32376
Gneisses	0.192	29.7565	5.71326	0.152449					Till-4(2)	105.076		All Tills			BJ1603 (2)	7.01044		24.4244	5.0367											1.95908	0.963712														94BRE330 Xenolith (2)	29.6035
Mica schist	0.048	500	24						Till-4(3)	83.9198		Average	StDev		BJ1603 (3)	5.21752		CM Basalt									G-2.3(3)	7.03696																	94BRE330 Xenolith (3)	36.2571
Amphibolites	0.054	22	1.188						Till 3292 (1)	86.7448	65.6142	81.243	36.353		Ruby mtn Basalt (1)	55.168	18.9745	30.1767	22.4609										0.819766	All Granite															S. Tuya (1)	35.4407	17.3236	17.3236	15.9677
Marble	0.009	1000	9						Till 3292 (2)	45.2941					Ruby mtn Basalt (2)	1.88582		Volcano Creek									SY-4.1 (2)	0.881057		15.7578	14.5585														S. Tuya (2)	11.2305
Total Average	1.0016		124.02	6.6541					Till 3292 (3)	64.8038					Ruby mtn Basalt (3)	-0.130438		20.1231	2.67907								SY-4.1 (3)	0.758475																	S. Tuya (3)	5.29947
									Till 3095 (1)	50.3965	51.4055				BJ1601 (1)	14.2519	7.54535	South Tuya Basalt									SY-4.2 (1)	5.01649	5.43631																S. Lake (1)	3.31217	5.64117	5.64117	2.18823
Lower cont crust proportions	Percentage	Avg N (ppm)	Avg N based on %	StDev					Till 3095 (2)	52.178					BJ1601 (2)	3.12907		15.1102	2.66923								SY-4.2 (2)	4.6845																	S. Lake (2)	5.95702
Felsic Granulites(Gneiss)	0.62	29.7565	18.4491	0.492282					Till 3095 (3)	51.642					BJ1601 (3)	5.25506		BHVO2									SY-4.2 (3)	6.60793																	S. Lake (3)	7.65431		All Xenoliths
Mafic Granulites(Xenoliths)	0.38	34.3696	13.0604	6.12502					Till 3079 (1)	43.9273	46.7662			2016_06_29	BCR-2 (1)	70.6261	57.1765	6.22883	5.44554								SY-4.3 (1)	15.1495	18.2194																			27.3181	16.6014
Total Average			31.5095	3.07239					Till 3079 (2)	39.5715					BCR-2 (2)	69.5471											SY-4.3 (2)	17.7693
									Till 3079 (3)	56.7999					BCR-2 (3)	31.3564		All volcanics									SY-4.3 (3)	21.7395
								2016_07_20	Till-4.1 (1)	126.331	130.276				BCR-2 (1.2)	51.4672	27.5254	average	stdev							2016_08_02	G-2 (1.a)	28.4638	18.6008
Our analyses alone	Concentrations (ppm)								Till-4.1(2)	131.924					BCR-2 (2.2)	20.317		21.4153	12.4832								G-2 (1.b)	8.7377
	Avg	StDev	Number of samples						Till-4.1(3)	132.574					BCR-2 (3.2)	10.792											G-2 (2.a)	7.36619	6.53979
Tills (ppm)	81.243	36.353	8						Till-4.2 (1)	103.884	107.029			2016_07_05	BJ1605 (1)	16.3272	15.7793										G-2 (2.b)	5.71338
Volcanics	21.4153	12.4832	13						Till-4.2(2)	109.744					BJ1605 (2)	15.8952										2016_08_03	G-2 (1)	1.11341	0.911882
Carbonates	114.177	40.893	1						Till-4.2(3)	107.46					BJ1605 (3)	15.1156											G-2 (2)	0.71035
Granitic	15.7578	14.5585	5						Till-4.3(1)	124.252	125.78				BJ1606 (1)	57.5943	51.9273										034 (1)	14.289	10.6939
Gabbro	11.2579	12.5761	5						Till-4.3(2)	117.139					BJ1606 (2)	44.91											034 (2)	7.09891
Gniess	29.7565	0.794004	1	<- Use for felsic granulite					Till-4.3(3)	135.949					BJ1606 (3)	53.2777											107 (1)	6.81706	8.45241
Xenolith	34.3696	16.1185	8	<-Use for Mafic granulite											CR56 Basalt (1)	20.4156	24.4244										107 (2)	10.0878
															CR56 Basalt (2)	22.7797											076 (1)	1.77939	1.86551
From Johnson and Goldblatt, 2015															CR56 Basalt (3)	30.0778											076 (2)	1.95164
Volcanics	50														BCR-2 (1)	36.146	37.2761										041 (1)	2.64053	1.95908
Carbonates	130														BCR-2 (2)	39.0906											041 (2)	1.27764
Granitic	54														BCR-2 (3)	36.5916
Gabbro	5														CM Basalt (1)	56.1041	30.1767
Gniess	135														CM Basalt (2)	16.6476
Mafic Granulites(Xenoliths)	17														CM Basalt (3)	17.7784
															Volc Creek (1)	18.7677	20.1231
															Volc Creek (2)	23.209
															Volc Creek (3)	18.3926
															S. Tuya Basalt (1)	13.8135	15.1102
															S. Tuya Basalt (2)	13.337
															S. Tuya Basalt (3)	18.1801
														2016_07_13	BCR-2 (1)	27.0898	29.5092
															BCR-2 (2)	32.6634
															BCR-2 (3)	28.7745
															BJ1601 (1)	18.4938	13.3834
															BJ1601 (2)	7.16996
															BJ1601 (3)	14.4864
															BJ1602 (1)	25.8867	20.974
															BJ1602 (2)	16.1186
															BJ1602 (3)	20.9168
															BJ1603 (1)	12.997	12.2697
															BJ1603 (2)	9.46635
															BJ1603 (3)	14.3459
															BJ1604 (1)	200.991	223.431
															BJ1604 (2)	266.338
															BJ1604 (3)	202.964
														2016_07_20	BCR-2.1 (1)	27.8261	22.1595
															BCR-2.1 (2)	17.5603
															BCR-2.1 (3)	21.0922
															BCR-2.2 (1)	34.8264	32.9595
															BCR-2.2 (2)	32.8745
															BCR-2.2 (3)	31.1775
															BCR-2.3 (1)	32.4535	26.0291
															BCR-2.3 (2)	26.845
															BCR-2.3 (3)	18.7886
															BHVO-2.1 (1)	19.6752	11.4205
															BHVO-2.1 (2)	8.03379
															BHVO-2.1 (3)	6.5526
															BHVO-2.2 (1)	4.09883	3.0024
															BHVO-2.2 (2)	4.06095
															BHVO-2.2 (3)	0.847432
															BHVO-2.3 (1)	2.9292	4.26355
															BHVO-2.3 (2)	5.48256
															BHVO-2.3 (3)	4.3789
														2016_08_02	BCR-1 (1.a)	24.1376	29.0352
															BCR-1 (1.b)	33.9328
															BCR-1 (2.a)	67.7593	67.7593
															BCR-1 (3.a)	51.0759	43.4219
															BCR-1 (3.b)	35.7678
[truncated: 5 more columns]
