# Supplementary material for: Measurement of geologic nitrogen using mass spectrometry, colorimetry, and a newly adapted fluorometry technique
Source: Copernicus journal article supplement (doi:10.5194/se-8-307-2017), 2017-03-10
Supplement: Supplementary file 1 [file se-8-307-2017-supplement.zip]

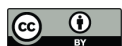

## *Supplement of*

# **Measurement of geologic nitrogen using mass spectrometry, colorimetry, and a newly adapted fluorometry technique**

**Benjamin W. Johnson et al.**

*Correspondence to:* Benjamin W. Johnson (bwjohnso@uvic.ca)

- se-8-307-2017-supplement-title-page.pdf
- Fluorcolor\_redux.csv
- N\_cc.xls
- Samples.csv
- all\_fluor\_runs\_raw.xls
- colourimetry\_raw.csv
- read\_me.txt
- sample\_description.txt

The copyright of individual parts of the supplement might differ from the CC-BY 3.0 licence.
