# Supplementary material for: Measurement of geologic nitrogen using mass spectrometry, colorimetry, and a newly adapted fluorometry technique
Source: Copernicus journal article supplement (doi:10.5194/se-8-307-2017), 2017-03-10
Supplement: Supplementary file 2 [file all_fluor_runs_raw.xls]

## Sheet: Sheet1
Compilation of all runs, raw data
Date (YYYY_MM__DD)	Sample_Std	Conc_ppm	Starting Conc_ug/L	vol_H2O_prim	vol_samp_prim	volume_H2O_mL	volume_sample_mL	Initial	Time_initial	Reading1	Reading2	Reading3	Time_final	Correc_conc (invial)	Net	Net-blank	Corr_fluor (in vial)
2016_06_22	Blank	0	0	22	2	9.94	0.06	-0.289	1050	15.77	15.85	15.8	1400	0	16.0957	0	0
	10ppm	10	10000	17	2	9.7	0.3	-0.292	1051	100.8	101.2	101.2	1402	1052.63	101.359	85.263	2842.1	slope	intercept	r^2
	50ppm	50	50000	22	2	9.94	0.06	-0.248	1052	154.4	156.2	156.1	1408	4166.67	155.815	139.719	23286.5	5.41545	0	0.982342
				Vol (L)														Conc in vial	Conc ppm	Average	StDev
	BCR-2 (1)			0.017	0.5	9.94	0.06	-0.273	1055	26.55	27.12	27.05	1410		27.1797	11.084	1847.33	341.123	23.1963	29.6991	5.84067
	BCR-2 (2)			0.017	0.5	9.94	0.06	-0.277	1056	30.25	31.47	30.75	1412		31.1003	15.0047	2500.78	461.786	31.4014
	BCR-2 (3)			0.017	0.5	9.94	0.06	-0.324	1058	31.66	32.58	32.53	1413		32.5807	16.485	2747.5	507.345	34.4994
2016_06_24	Blank	0	0	22	2	9.905	0.095	1.844	1148	9.125	9.125	9.024	1443	0	7.24733	0	0	slope	intercept	r^2
	10ppm	10	10000	22	2	9.53	0.47	0.623	1152	168.2	168.2	171.2	1445	833.333	168.577	161.33	3432.55	4.90904		0.998853
	50ppm	50	50000	22	2	9.905	0.095	0.019	1153	200.5	204	204	1446	4166.67	202.814	195.567	20586
		accepted		Vol (L)														Conc in vial	conc in rock
	BCR-2 (1)			0.021	0.5	9.92	0.08	0.81	1157	28.06	28	28.02	1447		27.2167	19.9693	2496.17	508.484	42.7126
	BCR-2 (2)			0.021	0.5	9.92	0.08	0.065	1158	18.9	19.12	19.12	1450		18.9817	11.7343	1466.79	298.794	25.0987	Average	StDev
	BCR-2 (3)			0.021	0.5	9.92	0.08	0.419	1159	17.98	18.04	18.43	1452		17.731	10.4837	1310.46	266.948	22.4236	30.0783	11.0231
2016_06_28	BlankB	5	5000	22	2	9.955	0.045	-0.001	1306	6.086	5.988	5.946	1612	0	6.00767	0	0
	5ppm	10	10000	22	2	9.1	0.9	-0.118	1313	138.5	141.3	141.2	1615	416.667	140.451	134.444	1493.82	slope	intercept	r^2
	10ppm	50	50000	22	2	9.55	0.45	-0.229	1315	139.7	141.2	140.8	1618	833.333	140.796	134.788	2995.29	5.23251	0	0.991902
	50ppm	100	100000	22	2	9.91	0.09	0.061	1316	170.5	174	173.9	1620	4166.67	172.739	166.731	18525.7
	100ppm	200	200000	22	2	9.955	0.045	-0.301	1308	208.2	211	211	1623	8333.33	210.368	204.36	45413.3
																				Average	Stdev
	BJ1604 (1)	NaN		0.017	0.5	9.91	0.09	0.045	1324	250.5	251.7	251	1625		251.022	245.014	27223.8	5202.81	353.791	275.13	72.6908
	BJ1604 (2)	NaN		0.017	0.5	9.91	0.09	-0.11	1325	151.3	152	151.6	1627		151.743	145.736	16192.9	3094.66	210.437
	BJ1604 (3)	NaN		0.017	0.5	9.91	0.09	0.028	1325	184.1	188.4	188.2	1631		186.872	180.864	20096	3840.61	261.161
	Llang Gabbro (1)	NaN		0.017	0.5	9.91	0.09	0.584	1328	20.71	20.52	20.41	1635		19.9627	13.955	1550.56	296.331	20.1505	8.1985	10.3517
	Llang Gabbro (2)	NaN		0.017	0.5	9.91	0.09	-0.042	1328	8.094	7.392	7.325	1637		7.64567	1.638	182	34.7825	2.36521
	Llang Gabbro (3)	NaN		0.017	0.5	9.91	0.09	0.468	1328	7.91	7.987	7.851	1639		7.448	1.44033	160.037	30.5851	2.07979
	BJ1602 (1)	NaN		0.017	0.5	9.91	0.09	0.882	1331	19.5	19.41	19.35	1641		18.538	12.5303	1392.26	266.078	18.0933	21.0864	3.06605
	BJ1602 (2)	NaN		0.017	0.5	9.91	0.09	-0.098	1331	22.69	22.95	22.41	1643		22.7813	16.7737	1863.74	356.185	24.2206
	BJ1602 (3)	NaN		0.017	0.5	9.91	0.09	-0.053	1331	20.39	20.51	20.48	1645		20.513	14.5053	1611.7	308.017	20.9452
	BCR-2 (1)	34		0.017	0.5	9.91	0.09	-0.088	1334	22.81	22.86	22.85	1646		22.928	16.9203	1880.04	359.299	24.4323	20.958	3.34884
	BCR-2 (2)	34		0.017	0.5	9.91	0.09	1.113	1334	21.25	21.58	21.52	1648		20.337	14.3293	1592.15	304.28	20.691
	BCR-2 (3)	34		0.017	0.5	9.91	0.09	0.046	1334	18.29	18.53	18.22	1650		18.3007	12.293	1365.89	261.039	17.7506
	ACG (1)	NaN		0.017	0.5	9.91	0.09	0.116	1336	11.31	11.36	11.18	1651		11.1673	5.15967	573.296	109.564	7.45037	6.20888	1.3092
	ACG (2)	NaN		0.017	0.5	9.91	0.09	0.105	1336	10.41	10.59	10.5	1653		10.395	4.38733	487.481	93.1639	6.33515
	ACG (3)	NaN		0.017	0.5	9.91	0.09	-0.034	1336	9.417	9.306	9.256	1654		9.36033	3.35267	372.519	71.193	4.84113
	Ruby Xenolith (1)	NaN		0.017	0.5	9.91	0.09	-0.019	1339	12.37	12.55	12.49	1656		12.489	6.48133	720.148	137.629	9.3588	6.38402	2.6718
	Ruby Xenolith (2)	NaN		0.017	0.5	9.91	0.09	-0.082	1339	9.9946	9.727	9.7	1658		9.8892	3.88153	431.281	82.4234	5.60479
	Ruby Xenolith (3)	NaN		0.017	0.5	9.91	0.09	-0.007	1339	8.599	8.71	9.395	1700		8.90833	2.90067	322.296	61.5949	4.18845
	BJ1603 (1)	NaN		0.017	0.5	9.91	0.09	0.436	1342	15.01	154.84	14.89	1702		61.144	55.1363	6126.26	1170.81	79.6148	30.6143	42.4452
	BJ1603 (2)	NaN		0.017	0.5	9.91	0.09	1.004	1344	11.32	12.14	12.14	1705		10.8627	4.855	539.444	103.095	7.01044
	BJ1603 (3)	NaN		0.017	0.5	9.91	0.09	0.472	1348	10.29	9.992	9.997	1707		9.621	3.61333	401.481	76.7282	5.21752
	J1408-5.1(1)	NaN		0.017	0.5	9.91	0.09	0.722	1349	57.45	58.19	58.47	1708		57.3147	51.307	5700.78	1089.49	74.0854	79.7703	5.03148
	J1408-5.1(2)	NaN		0.017	0.5	9.91	0.09	-0.089	1350	63.43	64.21	63.91	1709		63.939	57.9313	6436.81	1230.16	83.6507
	J1408-5.1(3)	NaN		0.017	0.5	9.91	0.09	-0.268	1351	62.18	62.26	62.26	1711		62.5013	56.4937	6277.07	1199.63	81.5748
	Ruby mtn Basalt (1)	NaN		0.017	0.5	9.91	0.09	0.033	1353	44.14	44.37	44.23	1713		44.2137	38.206	4245.11	811.295	55.168	18.9745	31.3608
	Ruby mtn Basalt (2)	NaN		0.017	0.5	9.91	0.09	0.001	1355	7.38	7.305	7.259	1714		7.31367	1.306	145.111	27.7326	1.88582
	Ruby mtn Basalt (3)	NaN		0.017	0.5	9.91	0.09	-0.078	1355	5.924	5.853	5.741	1715		5.91733	-0.0903333	-10.037	-1.91821	-0.130438
	Llang 955LML1 (1)	NaN		0.017	0.5	9.91	0.09	-0.046	1356	51.01	52.8	53.04	1717		52.3293	46.3217	5146.85	983.629	66.8868	38.1296	26.0035
	Llang 955LML1 (2)	NaN		0.017	0.5	9.91	0.09	-0.193	1357	26.97	27.69	27.67	1719		27.6363	21.6287	2403.19	459.279	31.231
	Llang 955LML1 (3)	NaN		0.017	0.5	9.91	0.09	-0.026	1357	17.3	17.06	17.39	1721		17.276	11.2683	1252.04	239.28	16.2711
	BJ1601 (1)	NaN		0.017	0.5	9.91	0.09	0.119	1359	15.67	16.19	16.13	1723		15.8777	9.87	1096.67	209.587	14.2519	7.54535	5.90453
	BJ1601 (2)	NaN		0.017	0.5	9.91	0.09	0.053	1400	8.157	8.326	8.2	1724		8.17467	2.167	240.778	46.0157	3.12907
	BJ1601 (3)	NaN		0.017	0.5	9.91	0.09	0.643	1401	11.01	10	9.86	1726		9.647	3.63933	404.37	77.2803	5.25506
	OMNG (1)	NaN		0.017	0.5	9.91	0.09	0.544	1401	27.75	26.58	26.53	1728		26.4093	20.4017	2266.85	433.224	29.4592	29.7565	0.794004
	OMNG (2)	NaN		0.017	0.5	9.91	0.09	0.152	1403	25.64	26.78	26.63	1730		26.198	20.1903	2243.37	428.737	29.1541
	OMNG (3)	NaN		0.017	0.5	9.91	0.09	-0.145	1403	26.58	27.36	27.34	1731		27.2383	21.2307	2358.96	450.828	30.6563
2016_06_29	Blank	0	0	22	2	9.905	0.095	-0.021	1142	26.97	27.69	27.67	1443	0	27.4643	0	0
	10ppm	10	10000	22	2	9.53	0.47	5.64	1148	339.5	345.6	345.9	1446	833.333	338.027	310.562	6607.71	slope	intercept	r^2
	50 ppm	50	50000	22	2	9.905	0.095	2.13	1150	365	384.4	384.8	1450	4166.67	375.937	348.472	36681.3	8.76989	0	0.999587
																				Average	StDev
	BCR-2 (1)			0.0185	0.5	9.73	0.27	-0.122	1153	251.9	253.9	254.2	1452		253.455	225.991	8370.04	954.407	70.6261	57.1765	22.3674
	BCR-2 (2)			0.0185	0.5	9.73	0.27	-0.236	1154	246.7	251.3	251.3	1453		250.003	222.538	8242.16	939.825	69.5471
	BCR-2 (3)			0.0185	0.5	9.73	0.27	-0.166	1155	127.1	128.4	127.4	1454		127.799	100.335	3716.11	423.735	31.3564
	BCR-2 (1.2)			0.0185	0.5	9.55	0.45	-0.241	1156	293.7	305.6	305.8	1455		301.941	274.477	6099.48	695.503	51.4672	27.5254	21.2742
	BCR-2 (2.2)			0.0185	0.5	9.55	0.45	-0.249	1157	135.7	135.6	135.4	1456		135.816	108.351	2407.81	274.554	20.317
	BCR-2 (3.2)			0.0185	0.5	9.55	0.45	-0.245	1158	84.11	85.11	85.1	1458		85.0183	57.554	1278.98	145.837	10.792
2016_07_05	Blank A	0	0	22	2	9.975	0.025	0.043	1310	7.734	6.7	6.571	1620	0	6.95867	-0.564667	-225.867
	Blank B	0	0	22	2	9.975	0.025	-0.165	1311	7.995	7.962	7.812	1622	0	8.088	0	0
	5ppm	5	5000	22	2	9.05	0.95	-0.083	1316	376.2	384.2	384.4	1624	416.667	381.683	374.16	3938.52	slope	intercept	r^2
	10ppm	10	10000	22	2	9.5	0.5	-0.23	1320	368.8	378.4	380.2	1626	833.333	376.03	368.507	7370.13	6.08432	0	0.953887
	50ppm	50	50000	22	2	9.905	0.095	-0.28	1325	424	435.4	436.8	1628	4166.67	432.347	424.823	44718.2
	200ppm	200	200000	22	2	9.975	0.025	-0.157	1312	246.8	249.2	249.2	1632	16666.7	248.557	241.034	96413.5
																				Average	StDev
	BJ1605 (1)	NaN		0.0235	0.5	9.905	0.095	0.567	1336	18.24	18.02	18.13	1634		17.563	10.0397	1056.81	173.694	16.3272	15.7793	0.614034
	BJ1605 (2)	NaN		0.0235	0.5	9.905	0.095	2.006	1337	19.76	19.08	19.07	1636		17.2973	9.774	1028.84	169.097	15.8952
	BJ1605 (3)	NaN		0.0235	0.5	9.905	0.095	0.442	1338	17.11	17.33	17.34	1638		16.818	9.29467	978.386	160.805	15.1156
	BJ1606 (1)	NaN		0.0235	0.5	9.905	0.095	1.705	1340	45.98	42.42	45.53	1640		42.9383	35.415	3727.89	612.706	57.5943	51.9273	6.44909
	BJ1606 (2)	NaN		0.0235	0.5	9.905	0.095	1.428	1341	36.11	37.46	36.13	1642		35.1387	27.6153	2906.88	477.766	44.91
	BJ1606 (3)	NaN		0.0235	0.5	9.905	0.095	1.216	1342	42.72	41.05	40.73	1644		40.284	32.7607	3448.49	566.784	53.2777
	96CR4 (1)	NaN		0.0235	0.5	9.905	0.095	0.955	1343	40.06	40.16	40	1646		39.1183	31.595	3325.79	546.617	51.382	26.5987	21.4823
	96CR4 (2)	NaN		0.0235	0.5	9.905	0.095	0.576	1345	17.61	17.42	17.16	1648		16.8207	9.29733	978.667	160.851	15.12
	96CR4 (3)	NaN		0.0235	0.5	9.905	0.095	0.592	1346	16.96	16.03	15.88	1650		15.698	8.17467	860.491	141.428	13.2942
	S. Lake (1)	NaN		0.0235	0.5	9.905	0.095	0.235	1348	9.737	9.837	9.811	1652		9.56	2.03667	214.386	35.2358	3.31217	5.64117	2.18823
	S. Lake (2)	NaN		0.0235	0.5	9.905	0.095	0.177	1349	11.32	11.41	11.36	1654		11.1863	3.663	385.579	63.3726	5.95702
	S. Lake (3)	NaN		0.0235	0.5	9.905	0.095	-0.075	1350	12.18	12.13		1656		12.23	4.70667	495.439	81.4288	7.65431
	CR56 Xenolith (1)	NaN		0.0235	0.5	9.905	0.095	0.328	1351	23.15	23.22	23.2	1658		22.862	15.3387	1614.6	265.37	24.9448	23.7321	2.97997
	CR56 Xenolith (2)	NaN		0.0235	0.5	9.905	0.095	0.328	1352	20.7	20.29	20.08	1701		20.0287	12.5053	1316.35	216.351	20.337
	CR56 Xenolith (3)	NaN		0.0235	0.5	9.905	0.095	0.145	1354	23.26	23.88	23.67	1703		23.4583	15.935	1677.37	275.687	25.9146
	Till 1253 (1)	NaN		0.0235	0.5	9.905	0.095	1.12	1355	36.12	37.45	37.46	1705		35.89	28.3667	2985.96	490.764	46.1318	38.3857	6.82281
	Till 1253 (2)	NaN		0.0235	0.5	9.905	0.095	0.006	1357	29.45	29.59	29.51	1707		29.5107	21.9873	2314.46	380.397	35.7573
	Till 1253 (3)	NaN		0.0235	0.5	9.905	0.095	0	1358	27.57	28.21	28.16	1709		27.98	20.4567	2153.33	353.915	33.268
	BCR-2 (1)	NaN		0.0235	0.5	9.905	0.095	-0.163	1400	29.34	29.75	29.67	1711		29.7497	22.2263	2339.61	384.532	36.146	37.2761	1.58717
	BCR-2 (2)	NaN		0.0235	0.5	9.905	0.095	0.283	1402	32.13	31.76	31.64	1713		31.5603	24.037	2530.21	415.858	39.0906
	BCR-2 (3)			0.0235	0.5	9.905	0.095	0.073	1403	30.34	30.07	29.88	1715		30.0237	22.5003	2368.46	389.272	36.5916
	CM Basalt (1)			0.0235	0.5	9.905	0.095	0.388	1405	41.88	42.74	42.61	1717		42.022	34.4987	3631.44	596.852	56.1041	30.1767	22.4609
	CM Basalt (2)			0.0235	0.5	9.905	0.095	0.11	1406	18.43	17.65	17.53	1719		17.76	10.2367	1077.54	177.102	16.6476
	CM Basalt (3)			0.0235	0.5	9.905	0.095	-0.082	1407	17.53	18.89	18.7	1721		18.4553	10.932	1150.74	189.132	17.7784
	CM 25 (1)			0.0235	0.5	9.905	0.095	0.322	1408	63.29	64.42	64.92	1723		63.888	56.3647	5933.12	975.15	91.6641	45.245	40.8683
	CM 25 (2)			0.0235	0.5	9.905	0.095	0.266	1410	16.54	16.66	17.24	1725		16.5473	9.024	949.895	156.122	14.6755
	CM 25 (3)			0.0235	0.5	9.905	0.095	0.278	1412	25.8	25.92	25.91	1727		25.5987	18.0753	1902.67	312.717	29.3954
	Till 1236 (1)			0.0235	0.5	9.905	0.095	0.126	1413	75.49	75.93	75.68	1729		75.574	68.0507	7163.23	1177.33	110.669	137.993	40.9646
	Till 1236 (2)			0.0235	0.5	9.905	0.095	0.088	1414	80.39	80.44	80.08	1731		80.2153	72.692	7651.79	1257.63	118.217
	Till 1236 (3)			0.0235	0.5	9.905	0.095	-0.005	1416	119.7	121.9	122.4	1733		121.338	113.815	11980.5	1969.08	185.094
	CR15 (1)			0.0235	0.5	9.905	0.095	0.344	1418	12.44	12.56	12.31	1735		12.0927	4.56933	480.982	79.0528	7.43097	37.9983	51.5841
	CR15 (2)			0.0235	0.5	9.905	0.095	0.324	1420	13.25	13.47	13.44	1737		13.0627	5.53933	583.088	95.8345	9.00845
	CR15 (3)			0.0235	0.5	9.905	0.095	0.976	1421	67.86	68.86	68.74	1739		67.5107	59.9873	6314.46	1037.83	97.5556
	CR56 Basalt (1)			0.0235	0.5	9.905	0.095	1.393	1423	23.31	20.57	20.53	1741		20.077	12.5537	1321.44	217.188	20.4156	24.4244	5.0367
	CR56 Basalt (2)			0.0235	0.5	9.905	0.095	1.526	1425	22.83	23.17	23.17	1743		21.5307	14.0073	1474.46	242.337	22.7797
	CR56 Basalt (3)			0.0235	0.5	9.905	0.095	0.245	1427	25.93	26.4	26.46	1745		26.0183	18.495	1946.84	319.977	30.0778
	S. Tuya (1)			0.0235	0.5	9.905	0.095	0.174	1428	29.56	29.45	29.46	1747		29.316	21.7927	2293.96	377.029	35.4407	17.3236	15.9677
	S. Tuya (2)			0.0235	0.5	9.905	0.095	2.451	1430	16.58	16.98	17.08	1749		14.429	6.90567	726.912	119.473	11.2305
	S. Tuya (3)			0.0235	0.5	9.905	0.095	0.358	1431	11.31	11.1	11.01	1751		10.782	3.25867	343.018	56.3773	5.29947
	CM Xenolith (1)			0.0235	0.5	9.905	0.095	0.147	1432	28.58	28.63	28.42	1753		28.3963	20.873	2197.16	361.118	33.9451	37.6384	5.79145
	CM Xenolith (2)			0.0235	0.5	9.905	0.095	0.355	1435	28.34	28.58	48.46	1755		34.7717	27.2483	2868.25	471.416	44.3131
	CM Xenolith (3)			0.0235	0.5	9.905	0.095	0.421	1436	29.11	29.4		1757		28.834	21.3107	2243.23	368.69	34.6569
	Till 4 (1)			0.0235	0.5	9.905	0.095	1.371	1437	51.14	52.21	52.58	1800		50.6057	43.0823	4534.98	745.356	70.0635	87.953	15.7625
	Till 4 (2)			0.0235	0.5	9.905	0.095	1.456	1438	66	67.14	67.19	1802		65.3207	57.7973	6083.93	999.936	93.994
	Till 4 (3)			0.0235	0.5	9.905	0.095	1.695	1439	71.03	70.4	70.33	1804		68.8917	61.3683	6459.82	1061.72	99.8014
	Volc Creek (1)			0.0235	0.5	9.905	0.095	0.793	1440	19.97	19.85	19.75	1806		19.0637	11.5403	1214.77	199.656	18.7677	20.1231	2.67907
	Volc Creek (2)			0.0235	0.5	9.905	0.095	0.052	1442	21.82	21.88	21.84	1808		21.7947	14.2713	1502.25	246.905	23.209
	Volc Creek (3)			0.0235	0.5	9.905	0.095	0.067	1443	18.98	18.88	18.84	1810		18.833	11.3097	1190.49	195.666	18.3926
	Till 1234 (1)			0.0235	0.5	9.905	0.095	3.618	1445	72.89	73.93	73.95	1812		69.972	62.4487	6573.54	1080.41	101.558	112.145	18.7094
	Till 1234 (2)			0.0235	0.5	9.905	0.095	0.432	1446	70.31	70.24	69.87	1814		69.708	62.1847	6545.75	1075.84	101.129
	Till 1234 (3)			0.0235	0.5	9.905	0.095	-0.055	1447	88.78	90.05	90.3	1816		89.765	82.2417	8657.02	1422.84	133.747
	J1408-5.1(1)			0.0235	0.5	9.905	0.095	0.313	1448	99.85	95.65	97.68	1818		97.4137	89.8903	9462.14	1555.17	146.186	128.279	20.5314
	J1408-5.1(2)			0.0235	0.5	9.905	0.095	0.19	1450	73.07	73.07	72.3	1820		72.6233	65.1	6852.63	1126.28	105.87
	J1408-5.1(3)			0.0235	0.5	9.905	0.095	1.876	1451	90.01	91.68	91.45	1822		89.1707	81.6473	8594.46	1412.56	132.781
	94BRE330 Xenolith (1)			0.0235	0.5	9.905	0.095	0.728	1452	36.56	36.77	36.55	1824		35.8987	28.3753	2986.88	490.914	46.1459	37.3355	8.32376
	94BRE330 Xenolith (2)			0.0235	0.5	9.905	0.095	0.02	1453	36.55	20.4	20.29	1826		25.7267	18.2033	1916.14	314.931	29.6035
	94BRE330 Xenolith (3)			0.0235	0.5	9.905	0.095	0.102	1455	29.69	30.08	29.99	1828		29.818	22.2947	2346.81	385.714	36.2571
	S. Tuya Basalt (1)			0.0235	0.5	9.905	0.095	0.006	1457	15.79	16.03	16.25	1830		16.0173	8.494	894.105	146.952	13.8135	15.1102	2.66923
	S. Tuya Basalt (2)			0.0235	0.5	9.905	0.095	-0.151	1458	15.72	15.52	15.48	1831		15.7243	8.201	863.263	141.883	13.337
	S. Tuya Basalt (3)			0.0235	0.5	9.905	0.095	-0.129	1459	18.49	18.67	18.56	1832		18.7023	11.179	1176.74	193.405	18.1801
2016_07_13	Blank B	0	0	22	2	9.975	0.025	-0.067	1130	6.744	7.221	6.749	1331	0	6.97167	0	0
	5ppm	5	5000	22	2	9.05	0.95	0.239	1140	301.1	304.1	304.2	1332	416.667	302.894	295.923	3114.98	FORCE THROUGH 0
	10ppm	10	10000	22	2	9.5	0.5	0.228	1141	335.7	340.3	340.3	1333	833.333	338.539	331.567	6631.34	slope	intercept	r^2
	50ppm	50	50000	22	2	9.905	0.095	0.04	1142	288.2	295.4	295	1334	4166.67	292.827	285.855	30090	6.80653	0	0.99791
	100ppm	100	100000	22	2	9.95	0.05	0.044	1150	310.3	310.3	310.4	1335	8333.33	310.289	303.318	60663.5
	200ppm	200	200000	22	2	9.975	0.025	0.736	1126	282.8	286.5	286.2	1335	16666.7	284.431	277.459	110984
																				Average	StDev
	Till 3072(1)	NaN		0.017	0.5	9.905	0.095	0.03	1128	80.14	81.36	81.28	1336		80.8967	73.925	7781.58	1143.25	77.7412	86.6185	13.2942
	Till 3072(2)	NaN		0.017	0.5	9.905	0.095	0.261	1130	104	104.2	104.2	1337		103.872	96.9007	10200.1	1498.57	101.903
	Till 3072(3)	NaN		0.017	0.5	9.905	0.095	1.921	1132	86.18	84.96	84.36	1338		83.2457	76.274	8028.84	1179.58	80.2114
	Till-4 (1)	NaN		0.017	0.5	9.905	0.095	1.674	1134	124.1	126.3	126.8	1339		124.059	117.088	12325	1810.76	123.132	104.042	19.6265
	Till-4(2)	NaN		0.017	0.5	9.905	0.095	1.744	1136	109.5	108.4	108	1340		106.889	99.9177	10517.6	1545.23	105.076
	Till-4(3)	NaN		0.017	0.5	9.905	0.095	0.498	1138	87.85	86.96	87	1341		86.772	79.8003	8400.04	1234.11	83.9198		StDev
	J1408-5.1(1)	NaN		0.017	0.5	9.905	0.095	0.267	1140	82.18	83.15	83.01	1342		82.513	75.5413	7951.72	1168.25	79.4409	82.5699	19.1399
	J1408-5.1(2)	NaN		0.017	0.5	9.905	0.095	0.221	1142	69.42	68.81	69.31	1343		68.959	61.9873	6524.98	958.636	65.1872
	J1408-5.1(3)	NaN		0.017	0.5	9.905	0.095	0.907	1144	104.9	106.3	106.5	1344		104.993	98.0213	10318	1515.9	103.081
	Till 3292 (1)	NaN		0.017	0.5	9.905	0.095	1.075	1146	89.64	90.97	90.99	1345		89.4583	82.4867	8682.81	1275.66	86.7448	65.6142	20.7372
	Till 3292 (2)	NaN		0.017	0.5	9.905	0.095	0.441	1148	50.1	50.74	50.61	1346		50.0423	43.0707	4533.75	666.089	45.2941
	Till 3292 (3)	NaN		0.017	0.5	9.905	0.095	0.439	1149	68.3	69.45	69.35	1347		68.5943	61.6227	6486.6	952.996	64.8038
	Till 3095 (1)	NaN		0.017	0.5	9.905	0.095	2.209	1150	56.47	57.42	57.42	1348		54.8943	47.9227	5044.49	741.125	50.3965	51.4055	0.913968
	Till 3095 (2)	NaN		0.017	0.5	9.905	0.095	0.605	1151	57.39	57.06	57.13	1349		56.5883	49.6167	5222.81	767.323	52.178
	Till 3095 (3)	NaN		0.017	0.5	9.905	0.095	0.378	1152	56.66	56.39	56.32	1350		56.0787	49.107	5169.16	759.441	51.642
	Till 3079 (1)	NaN		0.017	0.5	9.905	0.095	0.074	1153	48.46	49.04	48.95	1351		48.7427	41.771	4396.95	645.99	43.9273	46.7662	8.95817
	Till 3079 (2)	NaN		0.017	0.5	9.905	0.095	-0.074	1155	44.02	44.78	44.78	1353		44.6007	37.629	3960.95	581.934	39.5715
	Till 3079 (3)	NaN		0.017	0.5	9.905	0.095	-0.08	1157	59.98	61.46	61.27	1355		60.9833	54.0117	5685.44	835.292	56.7999
	BCR-2 (1)	34		0.017	0.5	9.905	0.095	0.125	1159	33.34	32.72	32.51	1357		32.7317	25.76	2711.58	398.379	27.0898	29.5092	2.85852
	BCR-2 (2)	34		0.017	0.5	9.905	0.095	0.565	1200	38.12	38.86	38.81	1359		38.0317	31.06	3269.47	480.344	32.6634
	BCR-2 (3)	34		0.017	0.5	9.905	0.095	0.433	1203	34.45	35.14	34.71	1400		34.3337	27.362	2880.21	423.154	28.7745
	BJ1601 (1)	NaN		0.017	0.5	9.905	0.095	0.599	1206	24.53	25.17	25.77	1401		24.5577	17.586	1851.16	271.968	18.4938	13.3834	5.74195
	BJ1601 (2)	NaN		0.017	0.5	9.905	0.095	0.407	1209	14.39	14.12	14.08	1402		13.7897	6.818	717.684	105.441	7.16996
	BJ1601 (3)	NaN		0.017	0.5	9.905	0.095	0.483	1212	21.06	21.32	21.31	1403		20.747	13.7753	1450.04	213.036	14.4864
	BJ1602 (1)	NaN		0.017	0.5	9.905	0.095	0.699	1215	31.94	32.56	32.36	1404		31.5877	24.616	2591.16	380.687	25.8867	20.974	4.88433
	BJ1602 (2)	NaN		0.017	0.5	9.905	0.095	0.401	1218	22.39	22.85	22.86	1405		22.299	15.3273	1613.4	237.038	16.1186
	BJ1602 (3)	NaN		0.017	0.5	9.905	0.095	2.965	1221	29.82	29.81	29.85	1407		26.8617	19.89	2093.68	307.599	20.9168
	BJ1603 (1)	NaN		0.017	0.5	9.905	0.095	0.466	1224	19.72	19.98	19.69	1409		19.3307	12.359	1300.95	191.132	12.997	12.2697	2.51975
	BJ1603 (2)	NaN		0.017	0.5	9.905	0.095	0.53	1227	16.47	16.55	16.49	1411		15.9733	9.00167	947.544	139.211	9.46635
	BJ1603 (3)	NaN		0.017	0.5	9.905	0.095	0.16	1230	20.76	20.81	20.75	1413		20.6133	13.6417	1435.96	210.969	14.3459
	BJ1604 (1)	NaN		0.017	0.5	9.905	0.095	0.97	1231	195.5	201.1	200.6	1415		198.097	191.125	20118.4	2955.75	200.991	223.431	37.1718
	BJ1604 (2)	NaN		0.017	0.5	9.905	0.095	0.964	1232	261.6	261.6	260.4	1417		260.236	253.264	26659.4	3916.74	266.338
	BJ1604 (3)	NaN		0.017	0.5	9.905	0.095	0.961	1233	200.3	201.1	201.4	1419		199.972	193.001	20315.9	2984.76	202.964
														Correc_conc (in brown bottle)
2016_07_20	Blank B	0	0	22	2	9.975	0.025	0.01	1136	7.019	6.927	6.577	1136	0	6.831	0
	5ppm	5	5000	22	2	9.975	0.025	0.012	1141	11.92	11.64	11.51	1141	1.13636	11.678	4.847		FORCE THROUGH 0
	10ppm	10	10000	22	2	9.975	0.025	-0.244	1143	21.96	22.22	22.16	1143	2.27273	22.3573	15.5263		slope		r^2
	50ppm	50	50000	22	2	9.975	0.025	-0.349	1145	72.03	73.05	72.85	1145	11.3636	72.9923	66.1613		5.60571	0	0.995086
	100ppm	100	100000	22	2	9.975	0.025	-0.134	1147	146.1	148.9	148.7	1147	22.7273	148.034	141.203
	200ppm	200	200000	22	2	9.975	0.025	1.014	1150	252.9	256.4	255.8	1150	45.4545	254.019	247.188						For each standard
																				Average	StDev	Average	StDev
	BCR-2.1 (1)	34		0.017		9.905	0.095	-0.053	1245	28.3	28.78	28.63	1615		28.623	21.792	3.88747	409.207	27.8261	22.1595	5.21547	27.0493	6.47183
	BCR-2.1 (2)	34		0.017		9.905	0.095	0.11	1245	20.98	20.52	20.58	1617		20.5833	13.7523	2.45327	258.239	17.5603
	BCR-2.1 (3)	34		0.017		9.905	0.095	-0.106	1245	23.22	23.15	23.36	1619		23.3493	16.5183	2.9467	310.179	21.0922
	BCR-2.2 (1)	34		0.017		9.905	0.095	0.218	1246	34.55	34.34	34.08	1620		34.1053	27.2743	4.86546	512.153	34.8264	32.9595	1.82595
	BCR-2.2 (2)	34		0.017		9.905	0.095	-0.02	1246	32.66	32.47	32.54	1621		32.5767	25.7457	4.59276	483.448	32.8745
	BCR-2.2 (3)	34		0.017		9.905	0.095	0.639	1246	31.59	32.27	31.8	1623		31.2477	24.4167	4.35568	458.493	31.1775
	BCR-2.3 (1)	34		0.017		9.905	0.095	0.023	1248	32.08	32.38	32.35	1625		32.247	25.416	4.53395	477.258	32.4535	26.0291	6.86889
	BCR-2.3 (2)	34		0.017		9.905	0.095	-0.208	1248	27.57	27.81	27.56	1628		27.8547	21.0237	3.7504	394.779	26.845
	BCR-2.3 (3)	34		0.017		9.905	0.095	0.248	1248	22.04	21.7	21.64	1629		21.5453	14.7143	2.62488	276.304	18.7886
	Till-4.1 (1)	NaN		0.017		9.905	0.095	2.066	1249	104.5	107.1	111.9	1630		105.767	98.9363	17.6492	1857.81	126.331	130.276	3.43208	121.029	11.9041
	Till-4.1(2)	NaN		0.017		9.905	0.095	2.453	1249	112.2	112	113.6	1632		110.147	103.316	18.4305	1940.05	131.924
	Till-4.1(3)	NaN		0.017		9.905	0.095	2.61	1249	113.3	113.4	113.1	1633		110.657	103.826	18.5214	1949.62	132.574
	Till-4.2 (1)	NaN		0.017		9.905	0.095	1.412	1158	89.06	89.85	89.89	1635		88.188	81.357	14.5132	1527.71	103.884	107.029	2.95327
	Till-4.2(2)	NaN		0.017		9.905	0.095	1.6	1158	93.79	94.76	94.58	1505		92.7767	85.9457	15.3318	1613.88	109.744
	Till-4.2(3)	NaN		0.017		9.905	0.095	1.905	1158	91.79	93.57	93.32	1506		90.9883	84.1573	15.0128	1580.29	107.46
	Till-4.3(1)	NaN		0.017		9.905	0.095	1.428	1200	104.5	106	106.2	1508		104.139	97.3077	17.3587	1827.23	124.252	125.78	9.49785
	Till-4.3(2)	NaN		0.017		9.905	0.095	1.485	1200	100.3	100.1	99.76	1510		98.5683	91.7373	16.365	1722.63	117.139
	Till-4.3(3)	NaN		0.017		9.905	0.095	1.667	1200	114.9	115.2	114.8	1511		113.3	106.469	18.9929	1999.25	135.949
	LKSD-4.1(1)	NaN		0.017		9.905	0.095	5.863	1205	846.4	819.6	820.4	1513		822.937	816.106	145.585	15324.7	1042.08	1026.07	33.5559	1064.17	113.164
	LKSD-4.1(2)	NaN		0.017		9.905	0.095	6.734	1205	752.4	803.6	804.8	1515		780.199	773.368	137.961	14522.2	987.51
	LKSD-4.1(3)	NaN		0.017		9.905	0.095	8.738	1205	825.2	842.4	842.8	1516		828.062	821.231	146.499	15421	1048.63
	LKSD-4.2(1)	NaN		0.017		9.905	0.095	6.202	1208	724.4	740	742.8	1517		729.531	722.7	128.922	13570.8	922.812	1039.43	107.589
	LKSD-4.2(2)	NaN		0.017		9.905	0.095	7.462	1208	840.8	846.8	847.2	1519		837.471	830.64	148.178	15597.6	1060.64
	LKSD-4.2(3)	NaN		0.017		9.905	0.095	8.026	1208	890.4	910	910.4	1520		895.574	888.743	158.543	16688.7	1134.83
	LKSD-4.3(1)	NaN		0.017		9.905	0.095	6.055	1211	734.8	742.4	743.6	1523		734.212	727.381	129.757	13658.6	928.788	1127.01	171.765
	LKSD-4.3(2)	NaN		0.017		9.905	0.095	7.86	1211	966.8	972.4	972	1524		962.54	955.709	170.489	17946.2	1220.34
	LKSD-4.3(3)	NaN		0.017		9.905	0.095	8.53	1211	963.6	987.6	989.2	1525		971.603	964.772	172.105	18116.4	1231.91
	G-2.1(1)	30		0.017		9.905	0.095	-0.165	1215	13.03	12.99	12.85	1526		13.1217	6.29067	1.12219	118.125	8.03252	8.31882	2.56029	5.08587	4.26431
	G-2.1(2)	30		0.017		9.905	0.095	-0.199	1215	11.2	11.32	11.27	1530		11.4623	4.63133	0.826182	86.9665	5.91372
	G-2.1(3)	30		0.017		9.905	0.095	0.133	1215	15.63	15.57	15.56	1531		15.4537	8.62267	1.53819	161.915	11.0102
	G-2.2(1)	30		0.017		9.905	0.095	-0.173	1218	8.293	8.093	7.992	1532		8.299	1.468	0.261876	27.5659	1.87448	4.17842	5.04692
	G-2.2(2)	30		0.017		9.905	0.095	-0.103	1218	7.475	7.148	7.193	1534		7.375	0.544	0.097044	10.2152	0.69463
	G-2.2(3)	30		0.017		9.905	0.095	-0.076	1218	14.54	14.7	14.44	1536		14.636	7.805	1.39233	146.561	9.96616
	G-2.3(1)	30		0.017		9.905	0.095	-0.052	1220	8.279	8.415	8.401	1537		8.417	1.586	0.282926	29.7817	2.02515	2.76036	3.96051
	G-2.3(2)	30		0.017		9.905	0.095	0.568	1220	6.846	6.735	6.781	1538		6.21933	-0.611667	-0.109115	-11.4858	-0.781034
	G-2.3(3)	30		0.017		9.905	0.095	0.108	1220	12.4	12.5	12.45	1539		12.342	5.511	0.983105	103.485	7.03696
	SY-4.1 (1)	NaN		0.017		9.905	0.095	0.552	1222	7.186	7.231	7.289	1540		6.68333	-0.147667	-0.0263422	-2.77286	-0.188555	0.483659	0.585372	8.04647	8.11875
	SY-4.1 (2)	NaN		0.017		9.905	0.095	0.142	1222	8.107	7.205	7.677	1541		7.521	0.69	0.123089	12.9567	0.881057
	SY-4.1 (3)	NaN		0.017		9.905	0.095	0.462	1222	7.996	7.878	7.787	1542		7.425	0.594	0.105963	11.154	0.758475
	SY-4.2 (1)	NaN		0.017		9.905	0.095	-0.173	1223	10.58	10.66	10.52	1543		10.7597	3.92867	0.700833	73.7719	5.01649	5.43631	1.02814
	SY-4.2 (2)	NaN		0.017		9.905	0.095	-0.103	1223	10.59	10.2	10.4	1545		10.4997	3.66867	0.654452	68.8897	4.6845
	SY-4.2 (3)	NaN		0.017		9.905	0.095	-0.076	1223	11.9	11.89	12	1546		12.006	5.175	0.923166	97.1754	6.60793
	SY-4.3 (1)	NaN		0.017		9.905	0.095	-0.062	1225	18.55	18.72	18.63	1548		18.6953	11.8643	2.11647	222.787	15.1495	18.2194	3.31801
	SY-4.3 (2)	NaN		0.017		9.905	0.095	0.033	1225	20.75	20.77	20.82	1549		20.747	13.916	2.48247	261.313	17.7693
	SY-4.3 (3)	NaN		0.017		9.905	0.095	-0.223	1225	23.57	23.68	23.65	1550		23.8563	17.0253	3.03714	319.699	21.7395
	BHVO-2.1 (1)	NaN		0.017		9.905	0.095	1.267	1228	23.33	23.59	23.6	1552		22.2397	15.4087	2.74875	289.342	19.6752	11.4205	7.18704	6.22883	5.44554
	BHVO-2.1 (2)	30		0.017		9.905	0.095	0.144	1228	13.48	13.18	13.14	1553		13.1227	6.29167	1.12237	118.144	8.03379
	BHVO-2.1 (3)	30		0.017		9.905	0.095	0.564	1228	12.47	12.51	12.6	1554		11.9627	5.13167	0.915436	96.3617	6.5526
	BHVO-2.2 (1)	30		0.017		9.905	0.095	-0.372	1230	9.644	9.709	9.654	1555		10.041	3.21	0.572631	60.2769	4.09883	3.0024	1.86636
	BHVO-2.2 (2)	30		0.017		9.905	0.095	0.302	1230	10.73	10.11	10.1	1556		10.0113	3.18033	0.567338	59.7198	4.06095
	BHVO-2.2 (3)	30		0.017		9.905	0.095	0.302	1230	8.01	7.713	7.667	1557		7.49467	0.663667	0.118391	12.4622	0.847432
	BHVO-2.3 (1)	30		0.017		9.905	0.095	0.133	1233	9.238	9.24	9.296	1600		9.125	2.294	0.409226	43.0764	2.9292	4.26355	1.28058
	BHVO-2.3 (2)	30		0.017		9.905	0.095	0.382	1233	11.53	11.58	11.41	1602		11.1247	4.29367	0.765946	80.6259	5.48256
	BHVO-2.3 (3)	30		0.017		9.905	0.095	0.133	1233	10.68	10.29	10.21	1605		10.2603	3.42933	0.611757	64.3955	4.3789
2016_08_02	Blank A	0	0		22	2	10	0.025	3.189	1112	6.144	6.112	6.094	1420	2.92767	4.681	0
	Blank B	0	0		22	2	10	0.025	0.471	1114	6.965	6.985	6.766	1422	6.43433	0	0	slope	intercept	R^2
	5ppm	5	5000		22	2	10	0.025	0.28	1124	7.638	7.696	7.712	1424	7.402	2.721	1.13636	3.1854	0	0.993683
	10ppm	10	10000		22	2	10	0.025	0.012	1125	12.17	12.32	12.34	1426	12.2647	7.58367	2.27273
	50ppm	50	50000		22	2	10	0.025	0.082	1126	36.67	36.73	36.82	1428	36.658	31.977	11.3636	3.23691	-0.26265
	100ppm	100	100000		22	2	10	0.025	0.103	1128	72.52	73.16	73.02	1429	72.797	68.116	22.7273
	200ppm	200	200000		22	2	10	0.025	0.228	1117	150.9	153.9	153.9	1430	152.672	147.991	45.4545
		accepted	sample mass	Vol (L)												Conc in Brown bottle	Conc In Vial	Conc in rock (ppm mass)		Average	StDev	Average	StDev
	BCR-1 (1.a)	34	0.2499	0.022		10	0.025	-0.237	1146	6.821	6.572	6.473	1447	6.859	2.178	0.683745	274.182	24.1376		29.0352	6.92625	42.5347	17.0841
	BCR-1 (1.b)	34	0.2499	0.022		10	0.095	-0.112	1147	15.98	16.19	16.2	1448	16.2353	11.5543	3.62728	385.446	33.9328
	BCR-1 (2.a)	34	0.2507	0.022		10	0.025	-0.038	1149	11.51	10.44	10.38	1451	10.8147	6.13367	1.92556	772.148	67.7593		113.303	76.2054
	BCR-1 (2.b)	34	0.2507	0.022		10	0.095	0.022	1150	65.04	64.8	64.15	1452	64.6413	59.9603	18.8235	2000.24	175.53
	BCR-1 (3.a)	34	0.2495	0.022		10	0.025	-0.163	1152	9.1	9.155	9.103	1453	9.28233	4.60133	1.44451	579.248	51.0759		43.4219	10.8245
	BCR-1 (3.b)	34	0.2495	0.022		10	0.095	-0.164	1153	16.53	16.77	16.73	1455	16.8407	12.1597	3.81731	405.64	35.7678
	J1408-5.1(1.a)	NaN	0.2504	0.022		10	0.025	-0.198	1154	12.3	12.6	12.52	1456	12.6713	7.99033	2.50842	1005.88	88.3759		119.674	44.2627	140.132	46.0387
	J1408-5.1(1.b)	NaN	0.2504	0.022		10	0.095	0.129	1156	15.98	76.57	76.41	1457	56.191	51.51	16.1707	1718.35	150.973
	J1408-5.1(2.a)	NaN	0.2507	0.022		10	0.025	0.416	1158	11.51	19.31	19.4	1458	16.324	11.643	3.65512	1465.7	128.622		153.56	35.2676
	J1408-5.1(2.b)	NaN	0.2507	0.022		10	0.095	-0.005	1157	65.04	65.97	65.94	1459	65.655	60.974	19.1417	2034.06	178.497
	J1408-5.1(3.a)	NaN	0.2499	0.022		10	0.025	-0.084	1159	13.07	12.84	12.77	1500	12.9773	8.29633	2.60449	1044.4	91.944		147.163	78.0916
	J1408-5.1(3.b)	NaN	0.2499	0.022		10	0.095	0.1	1200	73.69	73.51	73.88	1502	73.5933	68.9123	21.6338	2298.88	202.382
	G-2 (1.a)	NaN	0.251	0.022		10	0.025	-0.019	1201	8.014	6.835	6.876	1504	7.26067	2.57967	0.809841	324.746	28.4638		18.6008	13.9485	12.5703	10.6676
	G-2 (1.b)	NaN	0.251	0.022		10	0.095	-0.147	1202	7.57	7.522	7.475	1506	7.66933	2.98833	0.938135	99.6892	8.7377
	G-2 (2.a)	NaN	0.2504	0.022		10	0.025	-0.281	1203	5.146	5.053	4.999	1507	5.347	0.666	0.209079	83.8407	7.36619		6.53979	1.16871
	G-2 (2.b)	NaN	0.2504	0.022		10	0.095	1.351	1204	7.782	8.194	7.968	1508	6.63033	1.94933	0.611959	65.0287	5.71338
														Correc_conc (in brown bottle)
2016_08_03	Blank A	0	0	22	2	10	0.1	2.18	1100	5.384	5.165	5.141	1401	0	3.05	-0.138667	0
	Blank B	0	0	22	2	10	0.1	0.102	1102	3.616	3.322	3.35	1403	0	3.32733	0.138667	0
	5ppm	5.2119	5000	22	2	10	0.1	0.914	1110	39.69	39.8	39.69	1405	1.13636	38.8127	35.624	1.13636
	10ppm	10.423	10000	22	2	10	0.1	-0.036	1111	67.1	68	67.69	1406	2.27273	67.6327	64.444	2.27273	slope	intercept	R^2
	50ppm	53.211	50000	22	2	10	0.1	0.031	1112	347.2	352.4	352.2	1407	11.3636	350.569	347.38	11.3636	27.4311	0	0.994432
	100ppm	104.2	100000	22	2	10	0.1	0.245	1115	685.6	698.8	697.6	1410	22.7273	693.755	690.566	22.7273
	200ppm	195.107	200000	22	2	10	0.1	0.044	1103	1200.6	1212	1209.6	1412	45.4545	1207.36	1204.17	45.4545
																	Conc in Brown bottle	Conc In Vial	Conc in rock (ppm mass)	Average	StDev	Average	StDev
	G-2 (1)	NaN		0.022	0.25	10	0.1	0.021	1115	6.812	6.726	6.4	1415		6.625	3.43633	0.125272	12.6524	1.11341	0.911882	0.285009
	G-2 (2)	NaN		0.022	0.25	10	0.15	0.131	1117	6.512	6.772	6.492	1416		6.461	3.27233	0.119293	8.07216	0.71035
	034 (1)	NaN		0.022	0.2502	10	0.1	0.456	1118	47.31	48.18	47.85	1417		47.324	44.1353	1.60895	162.504	14.289	10.6939	5.08413
	034 (2)	NaN		0.022	0.2502	10	0.15	0.203	1119	36.35	36.05	35.96	1418		35.917	32.7283	1.19311	80.7339	7.09891
	107 (1)	NaN		0.022	0.2506	10	0.1	0.578	1120	30.92	22.12	21.53	1420		24.2787	21.09	0.768837	77.6525	6.81706	8.45241	2.31274
	107 (2)	NaN		0.022	0.2506	10	0.15	1.019	1121	50.6	51.03	50.74	1422		49.771	46.5823	1.69816	114.909	10.0878
	101 (1)	NaN		0.022	0.2506	10	0.1	0.443	1123	6.982	6.833	6.836	1423		6.44067	3.252	0.118552	11.9737	1.05117	0.907591	0.203045
	101 (2)	NaN		0.022	0.2506	10	0.15	0.285	1124	7.036	7.036	6.933	1425		6.71667	3.528	0.128613	8.70284	0.764016
	076 (1)	NaN		0.022	0.2498	10	0.1	0.888	1125	9.707	9.51	9.475	1426		8.676	5.48733	0.200041	20.2041	1.77939	1.86551	0.121802
	076 (2)	NaN		0.022	0.2498	10	0.15	0.558	1126	13.35	12.43	12.41	1429		12.172	8.98333	0.327488	22.16	1.95164
	069 (1)	NaN		0.022	0.2505	10	0.1	-0.097	1126	9.166	9.327	9.219	1432		9.33433	6.14567	0.22404	22.6281	1.9873	2.28756	0.424631
	069 (2)	NaN		0.022	0.2505	10	0.15	0.073	1127	15.15	15.35	15.12	1433		15.1337	11.945	0.435455	29.4658	2.58782
	015 (1)	NaN		0.022	0.2502	10	0.1	0.181	1130	0.562	0.563		1435		0.3815	-2.80717	-0.102335	-10.3359	-0.908829	-0.788953	0.169531
	015 (2)	NaN		0.022	0.2502	10	0.15	0.286	1131	0.634	0.146		1436		0.104	-3.08467	-0.112452	-7.60923	-0.669077
	021 (1)	NaN		0.022	0.2516	10	0.1	-0.018	1132	8.013	8.283	8.337	1437		8.229	5.04033	0.183746	18.5583	1.62274	2.05566	0.612231
	021 (2)	NaN		0.022	0.2516	10	0.15	-0.126	1133	14.59	14.58	14.63	1439		14.726	11.5373	0.420594	28.4602	2.48857
	030 (1)	NaN		0.022	0.2509	10	0.1	0.259	1134	5.691	5.647	5.789	1441		5.45	2.26133	0.082437	8.32613	0.730072	0.755636	0.0361529
	030 (2)	NaN		0.022	0.2509	10	0.15	0.066	1135	6.984	6.799	6.816	1442		6.80033	3.61167	0.131663	8.90922	0.781199
	041 (1)	NaN		0.022	0.2502	10	0.1	0.412	1136	11.66	11.84	11.77	1444		11.3447	8.156	0.297327	30.03	2.64053	1.95908	0.963712
	041 (2)	NaN		0.022	0.2502	10	0.15	-0.004	1137	9.304	9.054	8.867	1445		9.079	5.89033	0.214732	14.5302	1.27764
